# Supplementary material for: Distinguishing the combined vegetation and soil component of δ 13 C variation in speleothem records from subsequent degassing and prior calcite precipitation effects
Source: Copernicus journal article supplement (doi:10.5194/cp-19-2423-2023), 2023-12-04
Supplement: Supplementary file 1 [file cp-19-2423-2023-supplement.pdf]

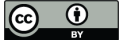

*Supplement of*

**Distinguishing the combined vegetation and soil component  
of  $\delta^{13}\text{C}$  variation in speleothem records from subsequent  
degassing and prior calcite precipitation effects**

**Heather M. Stoll et al.**

*Correspondence to:* Heather M. Stoll ([heather.stoll@erdw.ethz.ch](mailto:heather.stoll@erdw.ethz.ch))

The copyright of individual parts of the supplement might differ from the article licence.

Table S1. Fractionation factors 44-40 Ca calcite-dissolved

| $\Delta^{44}\text{Ca}$ | $\alpha^{44}\text{Ca}$ | Example                                                       | reference                                                    |
|------------------------|------------------------|---------------------------------------------------------------|--------------------------------------------------------------|
| -0.66                  | 0.99934                | White Moon Cave modern calcite; slow growth rate experimental | (de Wet et al., 2021; Mills et al., 2021; Tang et al., 2008) |
| -0.86                  | 0.99914                |                                                               |                                                              |
| -1.08                  | 0.99892                |                                                               |                                                              |
| -1.37                  | 0.99863                | Heshang Cave modern calcite; fast growth rate experimental    | (Mills et al., 2021; Owen et al., 2016; Tang et al., 2008)   |

Table S2. Age constraints for stalagmites. For BEL, GLD, and ROW

| Sample             | $^{238}\text{U}$ | $^{232}\text{Th}$ | $^{230}\text{Th} / ^{232}\text{Th}$ | $d^{234}\text{U}^*$ | $^{230}\text{Th} / ^{238}\text{U}$ | $^{230}\text{Th}$ Age (yr) | $^{230}\text{Th}$ Age (yr)         | $d^{234}\text{U}_{\text{initial}}^{**}$ | $^{230}\text{Th}$ Age (yr BP) <sup>***</sup> | mm from tip                 |       |
|--------------------|------------------|-------------------|-------------------------------------|---------------------|------------------------------------|----------------------------|------------------------------------|-----------------------------------------|----------------------------------------------|-----------------------------|-------|
| ID                 | (ppb)            | (ppt)             | (atomic $\times 10^{-6}$ )          | (measured)          | (activity)                         | (uncorrected)              | (corrected)                        | (corrected)                             | (corrected)                                  |                             |       |
| <b>GLD 60</b>      | 1221.8 $\pm$ 1.8 | 34 $\pm$ 1        | 348121 $\pm$ 14453                  | -13.2 $\pm$ 1.2     | 0.5892 $\pm$ 0.0015                | 99411 $\pm$ 461            | <b>99410 <math>\pm</math> 461</b>  | -17 $\pm$ 2                             | <b>99339</b>                                 | <b><math>\pm</math> 461</b> | 17.0  |
| GLD                |                  |                   |                                     |                     |                                    |                            |                                    |                                         | <b>111000*</b>                               |                             | 91.0  |
| GLD                |                  |                   |                                     |                     |                                    |                            |                                    |                                         | <b>133000*</b>                               |                             | 173.0 |
| GLD                |                  |                   |                                     |                     |                                    |                            |                                    |                                         | <b>185000*</b>                               |                             | 185.0 |
| <b>GLD 243</b>     | 839.2 $\pm$ 1.2  | 1061 $\pm$ 21     | 9823 $\pm$ 198                      | 32.8 $\pm$ 1.4      | 0.7531 $\pm$ 0.0017                | 140840 $\pm$ 785           | <b>140805 <math>\pm</math> 785</b> | 49 $\pm$ 2                              | <b>140734</b>                                | <b><math>\pm</math> 785</b> | 199.0 |
| <b>ROW43</b>       | 1518.6 $\pm$ 2.0 | 90 $\pm$ 2        | 170667 $\pm$ 4575                   | -17.8 $\pm$ 1.2     | 0.6118 $\pm$ 0.0011                | 106786 $\pm$ 400           | <b>106784 <math>\pm</math> 400</b> | -24 $\pm$ 2                             | <b>106715</b>                                | <b><math>\pm</math> 400</b> | 420   |
| <b>ROW-20</b>      | 1303.4 $\pm$ 1.7 | 285 $\pm$ 6       | 40397 $\pm$ 894                     | 6.3 $\pm$ 1.5       | 0.5353 $\pm$ 0.0010                | 82690 $\pm$ 309            | <b>82683 <math>\pm</math> 309</b>  | 8 $\pm$ 2                               | <b>82612</b>                                 | <b><math>\pm</math> 309</b> | 20    |
| <b>ROW-105</b>     | 1668.2 $\pm$ 1.7 | 212 $\pm$ 6       | 73666 $\pm$ 2144                    | -3.2 $\pm$ 1.2      | 0.5683 $\pm$ 0.0008                | 92117 $\pm$ 287            | <b>92113 <math>\pm</math> 287</b>  | -4 $\pm$ 2                              | <b>92042</b>                                 | <b><math>\pm</math> 287</b> | 105   |
| <b>ROW-260/286</b> | 1678.6 $\pm$ 1.7 | 147 $\pm$ 4       | 109562 $\pm$ 3083                   | -21.4 $\pm$ 1.1     | 0.5818 $\pm$ 0.0008                | 98891 $\pm$ 300            | <b>98888 <math>\pm</math> 300</b>  | -28 $\pm$ 1                             | <b>98817</b>                                 | <b><math>\pm</math> 300</b> | 260   |
| <b>BEL 5</b>       | 2358.2 $\pm$ 3.7 | 433 $\pm$ 9       | 57092 $\pm$ 1169                    | -68.7 $\pm$ 1.2     | 0.6358 $\pm$ 0.0013                | 128083 $\pm$ 621           | <b>128077 <math>\pm</math> 621</b> | -99 $\pm$ 2                             | <b>128008</b>                                | <b><math>\pm</math> 621</b> | 54.0  |
| <b>BEL 160</b>     | 896.6 $\pm$ 0.7  | 12 $\pm$ 2        | 776228 $\pm$ 151042                 | -53.0 $\pm$ 1.2     | 0.6551 $\pm$ 0.0009                | 130683 $\pm$ 524           | <b>130683 <math>\pm</math> 524</b> | -77 $\pm$ 2                             | <b>130612</b>                                | <b><math>\pm</math> 524</b> | 160.0 |
| <b>BEL 210</b>     | 1030.0 $\pm$ 0.9 | 16 $\pm$ 1        | 707178 $\pm$ 53512                  | -55.9 $\pm$ 1.2     | 0.6615 $\pm$ 0.0008                | 134172 $\pm$ 521           | <b>134171 <math>\pm</math> 521</b> | -82 $\pm$ 2                             | <b>134100</b>                                | <b><math>\pm</math> 521</b> | 210.0 |

\* based on tiepoints of  $\delta^{18}\text{O}$  with GAR record of Stoll et al., 2022

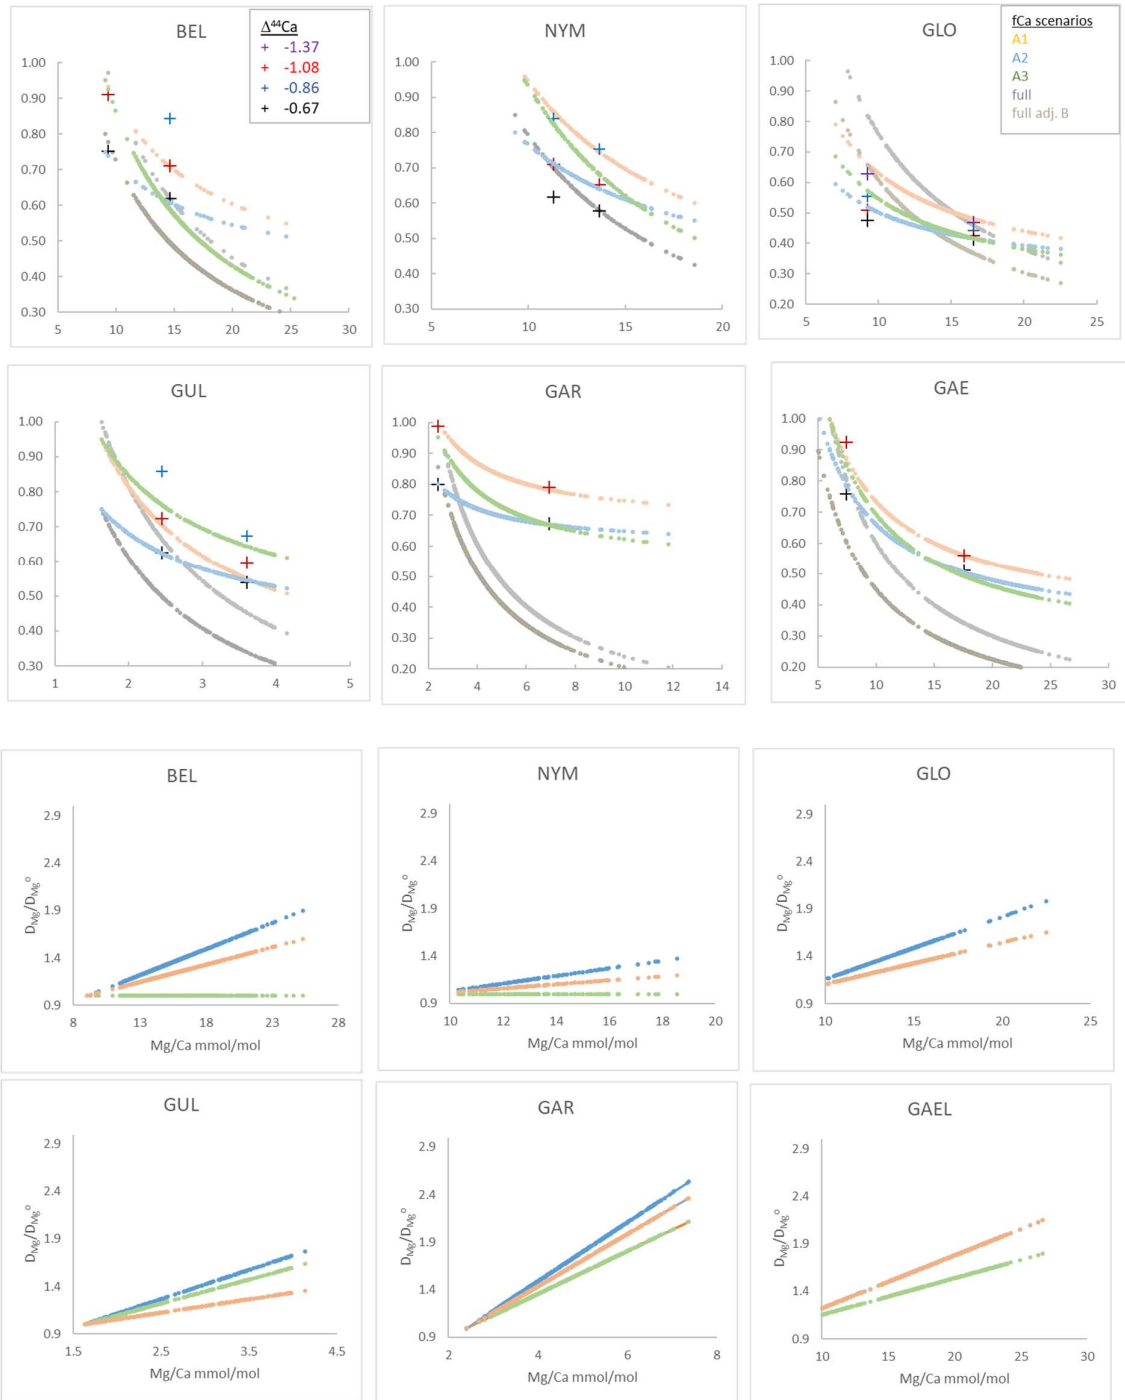

Figure S1. fCa vs measured Mg/Ca as Figure 5. Crosses show fCa calculated from  $d^{44}Ca$  according to different  $\Delta^{44}Ca$  fractionation factor. Gray curves show calculation of fCa from Mg/Ca assuming  $Mg/Ca_{min}$  reflects undegassed dripwater (upper gray line) or that undegassed dripwater is lower than minimum Mg/Ca by factor from 0.65 to 0.95 (lower gray line; value in Supplemental Table 1). Pink, blue, and green lines illustrate scenarios A1, A2, and A3 which are potential relationships between fCa and Mg/Ca consistent with  $\delta^{44}Ca$  fCa estimates according to Equation 7 and fit parameters in Table 2. c)-d) The variation in  $DMg$  implied by scenarios in a)-b), calculated as in Equation 8 and assuming constant congruent bedrock dissolution to yield a constant initial undegassed Mg/Ca ratio of dripwater. A 10°C temperature increase would cause  $D/D_0$  to reach 1.22 according to laboratory experiments (Day and Henderson, 2013).

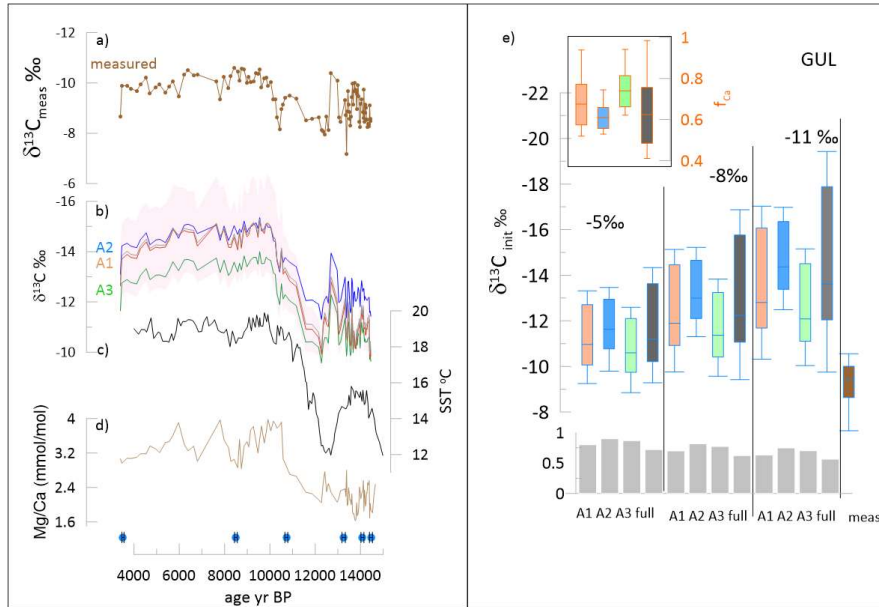

Figure S2. Full time series and statistics for Holocene stalagmite GUL. Supplementary Figure 2. Full time series and statistics for Holocene stalagmite GAL. Left panel shows the measured  $\delta^{13}\text{C}$  and the  $\delta^{13}\text{C}_{\text{init}}$  for three fCa scenarios; the line shows the result for degassing fractionation slope of  $-8\text{‰}$ , and shading for the A3 scenario shows the range using other degassing slopes of  $-5\text{‰}$  (more positive), and  $-11\text{‰}$  (more negative). Right panel, inset shows the median and range of fCa for the various scenarios. Box and whisker plot shows the median, upper and lower quartile, and 1/99% ranges for the calculated  $\delta^{13}\text{C}_{\text{init}}$  for each of the fCa scenarios (color coded as in Table 2 and Figure 5) and the measured  $\delta^{13}\text{C}$ . Gray bars at the base of each figure illustrate the Pearson correlation coefficient between the  $\delta^{13}\text{C}_{\text{init}}$  and the measured  $\delta^{13}\text{C}_{\text{init}}$ .

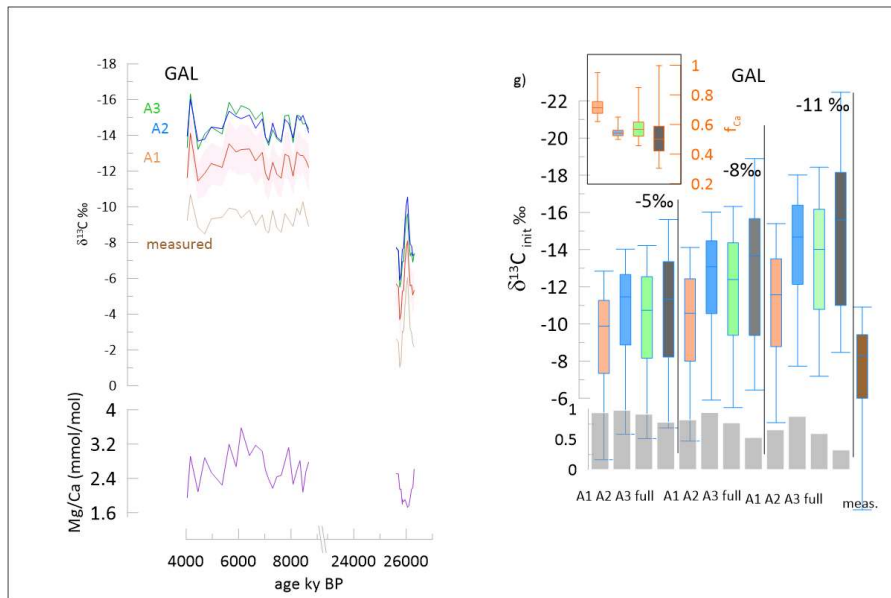

Figure S3. Full time series and statistics for Holocene stalagmite GAL. Left panel shows the measured  $\delta^{13}\text{C}$  and the  $\delta^{13}\text{C}_{\text{init}}$  for three fCa scenarios; the line shows the result for degassing fractionation slope of  $-8\text{‰}$ , and shading for the A3 scenario shows the range using other degassing slopes of  $-5\text{‰}$  (more positive), and  $-11\text{‰}$  (more negative). Right panel, inset shows the median and range of fCa for the various scenarios as in Supplemental Figure 2.

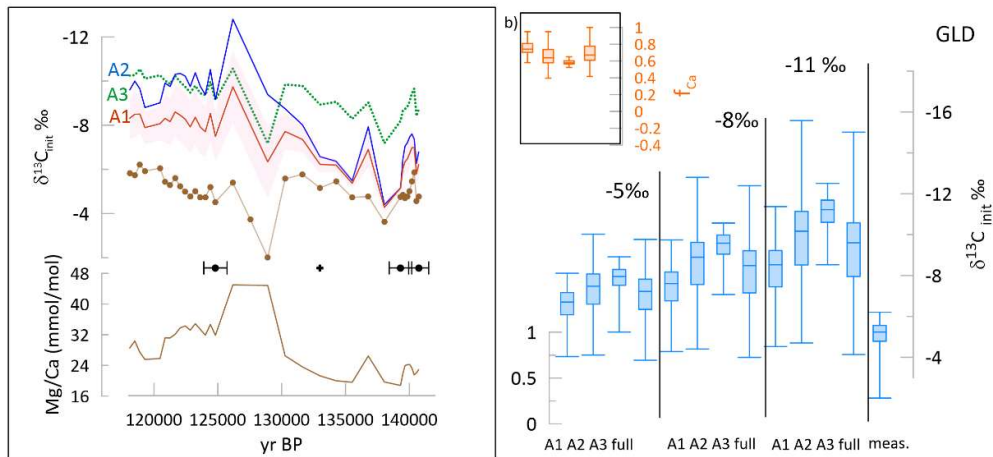

Figure S4. Full time series and statistics for stalagmite GLD. Left panel shows the measured  $\delta^{13}\text{C}$  and the  $\delta^{13}\text{C}_{\text{init}}$  for three  $f_{\text{Ca}}$  scenarios; the line shows the result for degassing fractionation slope of  $-8\text{‰}$ , and shading for the A1 scenario shows the range using other degassing slopes of  $-5\text{‰}$  (more positive), and  $-11\text{‰}$  (more negative). Right panel, inset shows the median and range of  $f_{\text{Ca}}$  for the various scenarios as in Supplemental Figure 2.

## Supplementary discussion on the potential role of non-bedrock Mg in this cave system

We have used I-STAL to investigate effects of changing seawater aerosol fluxes on stalagmite Mg/Ca ratios, assuming dripwater Na is entirely marine sourced and contributes marine Mg according to seawater Mg/Na ratio. Modern dripwater studies show Na concentrations of 5 ppm (Kost et al., in review).

Systematic variation in the relative contribution of bedrock Mg and Mg input from non-bedrock sources, such as marine aerosols, exerts only limited influence on the initial Mg/Ca of undegassed dripwater in this system. Aerosol monitoring studies show that the aerosol delivery at these distances from the coast is insensitive to increased distance from the coast, such as the up to 4 km additional distance at glacial sea level minima (Meira et al., 2007; Meira et al., 2006). Even for the stalagmites fed by lowest bedrock Mg/Ca, reduction in the degree of bedrock dissolution (eg from 105 to 60 ppm Ca), with constant modern rates of aerosol delivery, would lead to only modest increase in the estimated fCa by about 10%, much smaller than the up to 2-fold amplification observed for many stalagmites. Rather, if Mg partitioning were varying only in the range expected due to temperature dependence, stalagmites fed by such bedrock sources would require a 4-fold increase in delivery of non-bedrock Mg sources to generate the observed amplification of Mg/Ca with respect to  $\delta^{44}\text{Ca}$ . For stalagmites fed by the intermediate Mg bedrock (eg GAR), a 7-fold increase in delivery of non-bedrock Mg sources would be required to generate the observed amplification of Mg/Ca with respect to  $\delta^{44}\text{Ca}$ . These would reflect rather dramatic changes in external fluxes which must also be systematically related to the PCP and thereby correlate with  $\delta^{44}\text{Ca}$ . While such a correlation cannot be ruled out on the basis of current data, a systematic correlation between DMg and Mg/Ca is a more straightforward mechanism for the observed amplification. A larger dataset of paired  $\delta^{44}\text{Ca}$  and Mg/Ca for a given stalagmite, coupled with assessment of changes in fluid inclusion density, would be useful to further test the factors responsible for inferred apparent variation in DMg.

## References

- Day, C.C., Henderson, G.M., 2013. Controls on trace-element partitioning in cave-analogue calcite. *Geochimica et Cosmochimica Acta* 120, 612-627.
- de Wet, C.B., Erhardt, A.M., Sharp, W.D., Marks, N.E., Bradbury, H.J., Turchyn, A.V., Xu, Y., Oster, J.L., 2021. Semiquantitative estimates of rainfall variability during the 8.2 kyr event in California using speleothem calcium isotope ratios. *Geophysical Research Letters* 48, e2020GL089154.
- Meira, G., Andrade, C., Alonso, C., Padaratz, I., Borba Jr, J., 2007. Salinity of marine aerosols in a Brazilian coastal area—Influence of wind regime. *Atmospheric Environment* 41, 8431-8441.
- Meira, G., Andrade, M., Padaratz, I., Alonso, M., Borba Jr, J., 2006. Measurements and modelling of marine salt transportation and deposition in a tropical region in Brazil. *Atmospheric Environment* 40, 5596-5607.
- Mills, J.V., DePaolo, D.J., Lammers, L.N., 2021. The influence of Ca: CO<sub>3</sub> stoichiometry on Ca isotope fractionation: Implications for process-based models of calcite growth. *Geochimica et Cosmochimica Acta* 298, 87-111.
- Owen, R., Day, C., Hu, C.-Y., Liu, Y.-H., Pointing, M., Blättler, C., Henderson, G., 2016. Calcium isotopes in caves as a proxy for aridity: Modern calibration and application to the 8.2 kyr event. *Earth and Planetary Science Letters* 443, 129-138.
- Tang, J., Dietzel, M., Böhm, F., Köhler, S.J., Eisenhauer, A., 2008. Sr<sup>2+</sup>/Ca<sup>2+</sup> and <sup>44</sup>Ca/<sup>40</sup>Ca fractionation during inorganic calcite formation: II. Ca isotopes. *Geochimica et Cosmochimica Acta* 72, 3733-3745.
